# Supplementary material
Source: PubMed Central journal article supplement (PMC3347417)
Supplement: supp_32.10.2010_MCB6193-11_ST1.pdf [file supp_32.10.2010_MCB6193-11_ST1.pdf]

| Gene          | Forward primer           | Reverse primer          | Probe                       |
|---------------|--------------------------|-------------------------|-----------------------------|
| IL-1 $\beta$  | GCAACAAGTGGTGTTCTCCAT    | CACTCTCCAGCTGTAGAGTGGG  | CCTGTGGCCTTGGGCCTCAA        |
| IL-6          | AGCCCTGAGAAAGGAGACATGTAA | TTCACCAGGCAAGTCTCCTCAT  | TGTGTGAAAGCAGCAAAGAGGCACTGG |
| IL-8          | GCGCCAACACAGAAATTATTGTA  | TGAATTCTCAGCCCTCTTCAAA  | TTCTCCACAACCTCTGCACCCAG     |
| MCP-1         | TCGCTCAGCCAGATGCAAT      | ACACTTGCTGCTGGTGATTCTT  | TCAGTGCAGAGGCTCGCGAGCT      |
| PAI-1         | TCCTCATCCACAGCTGTCATAGT  | GGGTCTGTCCATGATGATCTCC  | TCAGCCCGCATGGCCCC           |
| SAA-1         | AAGTGATCAGCGATGCCAGA     | GCAGAGTGAAGAGGAAGCTCAGT | ACTTCCGACCTGCTGGCCTGCC      |
| SAA-2         | GAAGTGATCAGCAATGCCAGA    | GCAGAGTGAAGAGGAAGCTCAGT | ACTTCCGACCTGCTGGCCTGCC      |
| TNF- $\alpha$ | CCCAGGCAGTCAGATCATCTT    | CAGCTTGAGGGTTTGCTACAAC  | CCCGAGTGACAAGCCTGTAGCCCA    |

**Table S1 TaqMan primer and probe sequences used to measure gene expression in human macrophages.**
